# Supplementary material for: Biogenic, urban, and wildfire influences on the molecular composition of dissolved organic compounds in cloud water
Source: Copernicus journal article supplement (doi:10.5194/acp-17-15167-2017), 2017-12-21
Supplement: Supplementary file 1 [file acp-17-15167-2017-supplement.pdf]

Supplement of Atmos. Chem. Phys., 17, 15167–15180, 2017  
<https://doi.org/10.5194/acp-17-15167-2017-supplement>  
© Author(s) 2017. This work is distributed under  
the Creative Commons Attribution 4.0 License.

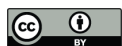

*Supplement of*

## **Biogenic, urban, and wildfire influences on the molecular composition of dissolved organic compounds in cloud water**

**Ryan D. Cook et al.**

*Correspondence to:* Kerri A. Pratt ([prattka@umich.edu](mailto:prattka@umich.edu))

The copyright of individual parts of the supplement might differ from the CC BY 4.0 License.

22 **Table S1.** Average August-September total organic carbon (TOC) and sulfate cloud water  
23 concentrations at Whiteface Mountain, NY

| <b>Year</b> | <b>TOC (mg L<sup>-1</sup>)</b> | <b>SO<sub>4</sub><sup>2-</sup> (μM)</b> |
|-------------|--------------------------------|-----------------------------------------|
| 2010        | 4.09                           | 53.7                                    |
| 2011        | 3.15                           | 47.7                                    |
| 2012        | 4.16                           | 54.2                                    |
| 2013        | 3.00                           | 45.8                                    |
| 2014        | 3.06                           | 32.3                                    |
| 2015        | 4.18                           | 50.5                                    |

24

25 **Table S2.** Cloud water sample TOC after SPE concentration (TOC<sub>1</sub>) and after dilution  
26 (TOC<sub>2</sub>), prior to ESI-FT-ICR analysis

| Sample ID | TOC <sub>1</sub> (mg L <sup>-1</sup> ) | TOC <sub>2</sub> (mg L <sup>-1</sup> ) |
|-----------|----------------------------------------|----------------------------------------|
| A1        | 15                                     | 15                                     |
| A2        | 32                                     | 32                                     |
| A3        | 42                                     | 42                                     |
| B1        | 37                                     | 37                                     |
| B2        | 45                                     | 45                                     |
| C1        | 361                                    | 30                                     |
| C2        | 398                                    | 30                                     |
| C3        | 153                                    | 30                                     |

27

28 **Table S3.** Peak assignments of cloud water samples showing the molecular formula (mf) and  
29 compound type (ct). This table can be found in “Cook\_etal\_2017\_TableS3.xlsx” The columns  
30 of the table are described below:

31 Column ‘A’ contains the observed peak  $m/z$  [M-H]<sup>-</sup> in the mass spectra;

32 Column ‘B’ contains the log<sub>10</sub> of the peak intensity of each assigned compound in sample A1  
33 (0 denotes not identified in sample);

34 Column ‘C’ contains the log<sub>10</sub> of the peak intensity of each assigned compound in sample A2  
35 (0 denotes not identified in sample);

36 Column ‘D’ contains the log<sub>10</sub> of the peak intensity of each assigned compound in sample A3  
37 (0 denotes not identified in sample);

38 Column ‘E’ contains the log<sub>10</sub> of the peak intensity of each assigned compound in sample B1  
39 (0 denotes not identified in sample);

40 Column ‘F’ contains the log<sub>10</sub> of the peak intensity of each assigned compound in sample B2  
41 (0 denotes not identified in sample);

42 Column ‘G’ contains the log<sub>10</sub> of the peak intensity of each assigned compound in sample C1  
43 (0 denotes not identified in sample);

44 Column ‘H’ contains the log<sub>10</sub> of the peak intensity of each assigned compound in sample C2  
45 (0 denotes not identified in sample);

46 Column ‘I’ contains the log<sub>10</sub> of the peak intensity of each assigned compound in sample C3  
47 (0 denotes not identified in sample);

48 Column ‘J’ contains the number of carbon atoms present in the assigned molecular structure  
49 of the compounds present;

50 Column ‘K’ contains the number of hydrogen atoms present in the assigned molecular structure  
51 of the compounds present;

52 Column ‘L’ contains the number of oxygen atoms present in the assigned molecular structure  
53 of the compounds present;

54 Column ‘M’ contains the number of nitrogen atoms present in the assigned molecular structure  
55 of the compounds present;

56 Column ‘N’ contains the number of sulfur atoms present in the assigned molecular structure of  
57 the compounds present;

58 Column ‘O’ contains the error (in ppm) between the peak  $m/z$  and the assigned formula’s  
59 molecular weight;

60 Column ‘P’ contains the mf assigned to each peak;

61 Column ‘Q’ contains the ct classification of the assigned mf.

62 **Table S4.** Average hydrogen-to-carbon (H:C) ratios and double bond equivalent (DBE) values,  
63 as well as 95% confidence intervals, for the Whiteface Mountain cloud water negative ion mass  
64 spectrometry data

65

| Sample           | H:C               | DBE             |
|------------------|-------------------|-----------------|
| All samples      | $1.466 \pm 0.005$ | $6.03 \pm 0.05$ |
| Biogenic (A1-A3) | $1.50 \pm 0.01$   | $5.3 \pm 0.1$   |
| Urban (B1-B2)    | $1.504 \pm 0.008$ | $5.96 \pm 0.09$ |
| Wildfire (C1-C3) | $1.427 \pm 0.007$ | $6.34 \pm 0.07$ |

66

67 **Table S5.** Summary of cloud water molecular composition from (-)ESI-FTICR-MS ( $m/z$  100-1000). The average ( $\pm$  95% confidence interval)  
 68 oxygen-to-carbon (O:C) and hydrogen-to-carbon (H:C) ratios, double bond equivalents (DBE), and the number of organic compounds assigned  
 69 (Total), as well as numbers and percentages by (CHO, CHOS, CHNOS, CHNO) for each sample.

70

| Event    | Sample ID | O:C             | H:C             | DBE             | Number (%) |          |        |          |       |
|----------|-----------|-----------------|-----------------|-----------------|------------|----------|--------|----------|-------|
|          |           |                 |                 |                 | CHO        | CHOS     | CHNOS  | CHNO     | Total |
| Biogenic | A1        | 0.47 $\pm$ 0.02 | 1.51 $\pm$ 0.03 | 4.97 $\pm$ 0.26 | 225 (53)   | 61 (14)  | 31 (7) | 110 (26) | 427   |
|          | A2        | 0.47 $\pm$ 0.01 | 1.49 $\pm$ 0.02 | 5.49 $\pm$ 0.19 | 361 (51)   | 102 (14) | 63 (9) | 181 (26) | 707   |
|          | A3        | 0.45 $\pm$ 0.01 | 1.51 $\pm$ 0.01 | 5.44 $\pm$ 0.14 | 397 (56)   | 33 (5)   | 7 (1)  | 272 (38) | 709   |
| Urban    | B1        | 0.50 $\pm$ 0.01 | 1.51 $\pm$ 0.01 | 6.05 $\pm$ 0.11 | 1008 (44)  | 227 (10) | 60 (3) | 981 (43) | 2276  |
|          | B2        | 0.46 $\pm$ 0.01 | 1.49 $\pm$ 0.01 | 5.75 $\pm$ 0.13 | 497 (53)   | 65 (7)   | 39 (4) | 338 (36) | 939   |
| Wildfire | C1        | 0.58 $\pm$ 0.01 | 1.39 $\pm$ 0.01 | 6.55 $\pm$ 0.14 | 712 (45)   | 211 (13) | 28 (2) | 644 (40) | 1595  |
|          | C2        | 0.56 $\pm$ 0.01 | 1.43 $\pm$ 0.01 | 6.14 $\pm$ 0.14 | 714 (51)   | 180 (13) | 19 (1) | 480 (35) | 1393  |
|          | C3        | 0.47 $\pm$ 0.01 | 1.46 $\pm$ 0.01 | 6.32 $\pm$ 0.11 | 858 (47)   | 93 (5)   | 10 (1) | 866 (47) | 1827  |

71

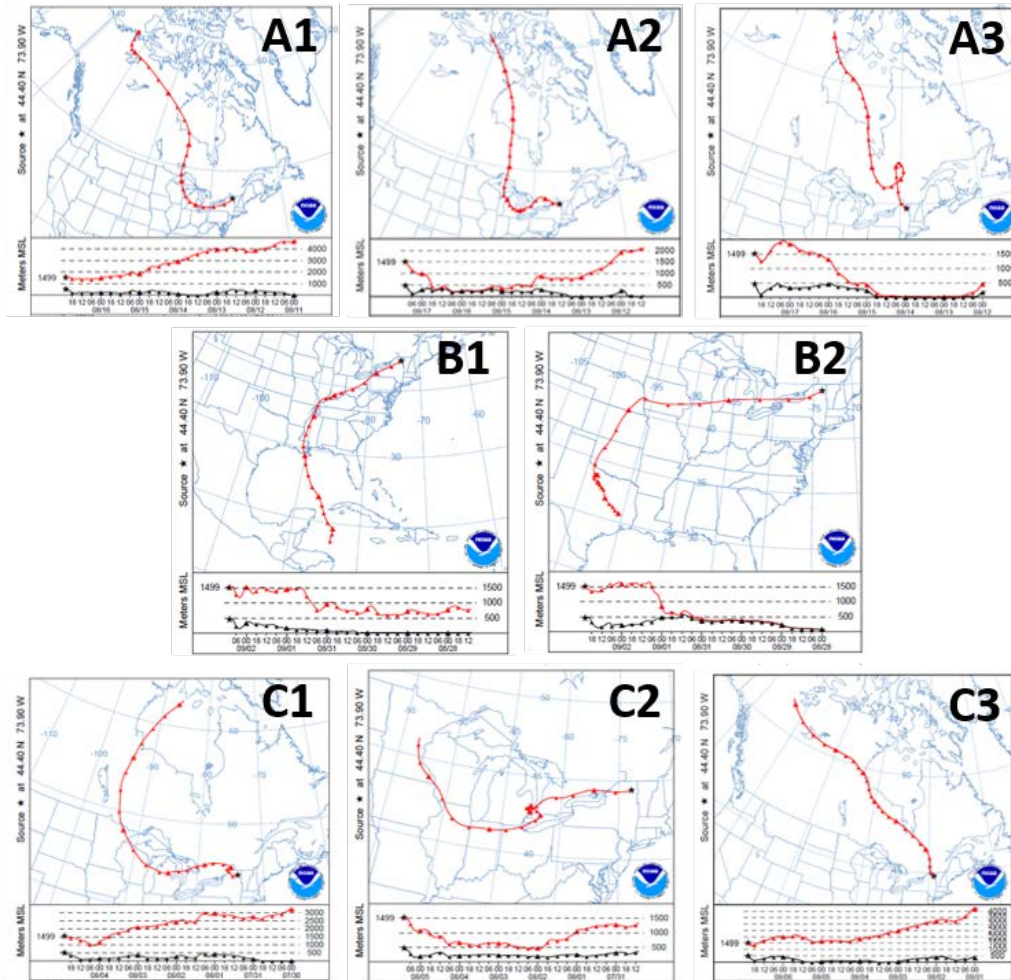

72

73 **Fig. S1.** NOAA HYSPLIT 144 h (6 day) backward air mass trajectory analysis at 1499 m  
 74 (red line) above mean sea level (MSL) in 6 h intervals for the cloud water samples collected  
 75 on (A1-3) August 16-17, 2014, (B1-2) September 2, 2014, and (C1-3) August 4-6, 2014.

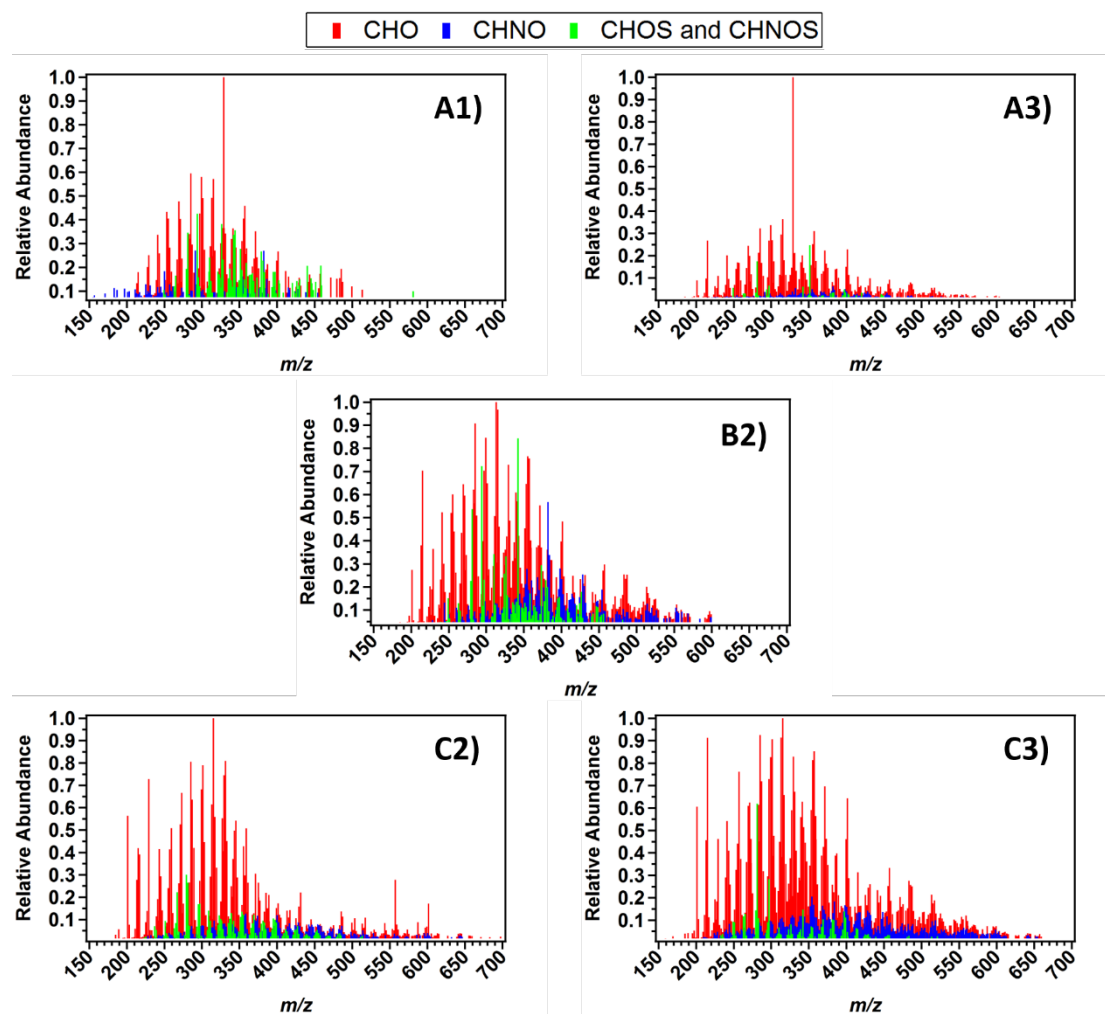

76

77 **Fig. S2.** Reconstructed ESI-FTICR-MS negative ion mass spectra of compound types (CHO,  
 78 CHNO, CHOS, and CHNOS) for cloud water samples collected during biogenic influence  
 79 (A1 and A3), urban influence (B2), and Canadian wildfire influence (C2 and C3).



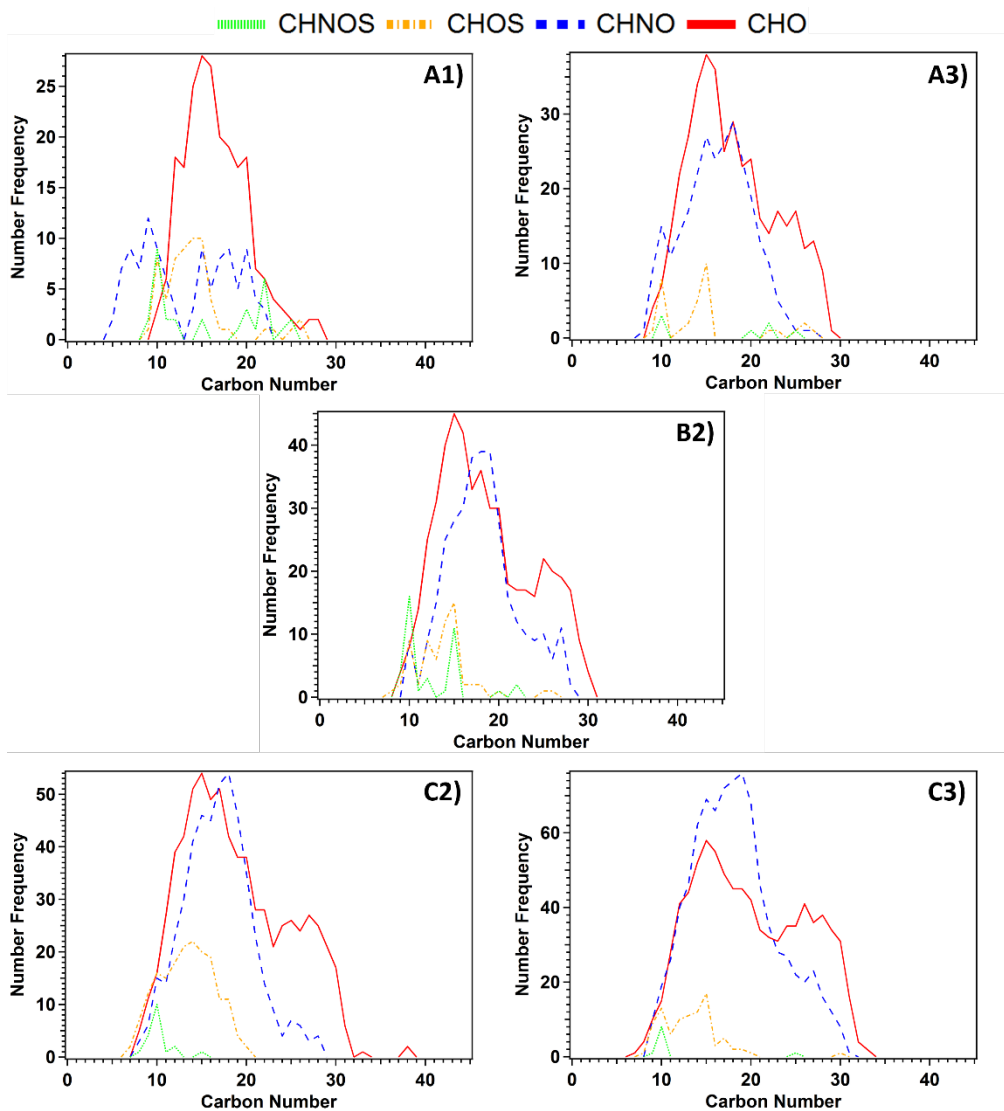

80

81 **Fig. S3.** Carbon number frequency distribution of organic compounds identified in cloud  
 82 water collected during biogenic (A1 and A3), urban (B2), and wildfire (C2 and C3)  
 83 influences.

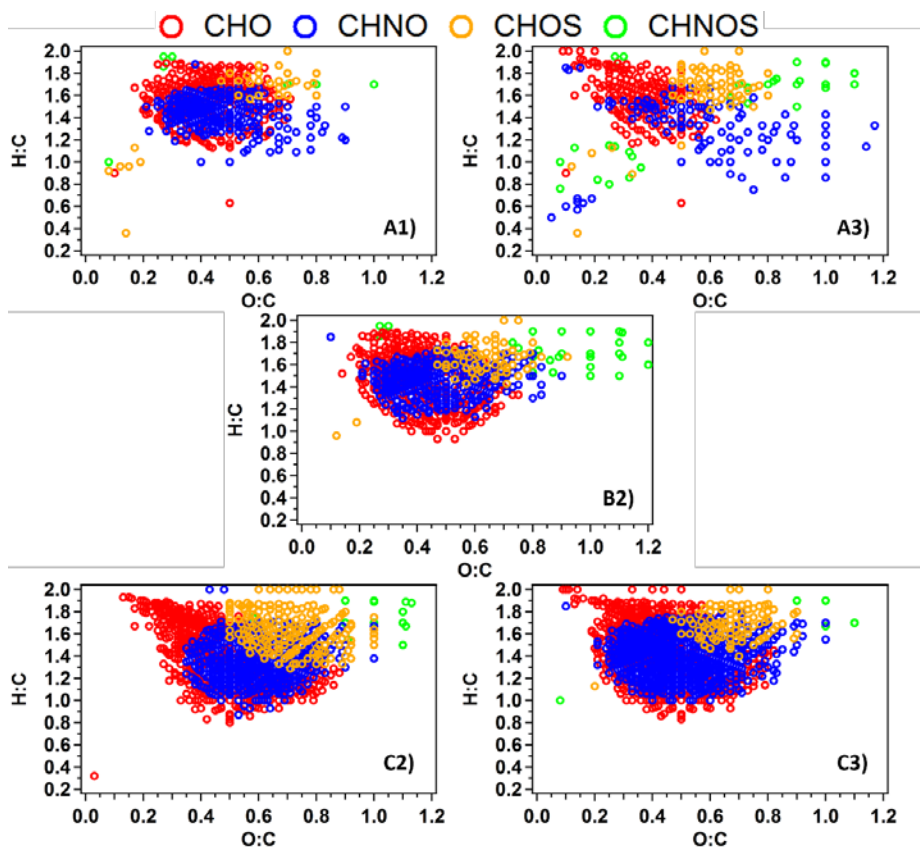

84

85 **Fig. S4.** Van Krevelen diagrams for the identified negative ions for the cloud water samples  
 86 collected on (A1) 08/16/2014 18:00, (A3) 08/17/2014 18:00, (B2) 09/02/2014 18:00, (C2)  
 87 08/05/2014 06:00, and (C3) 08/06/2014 18:00

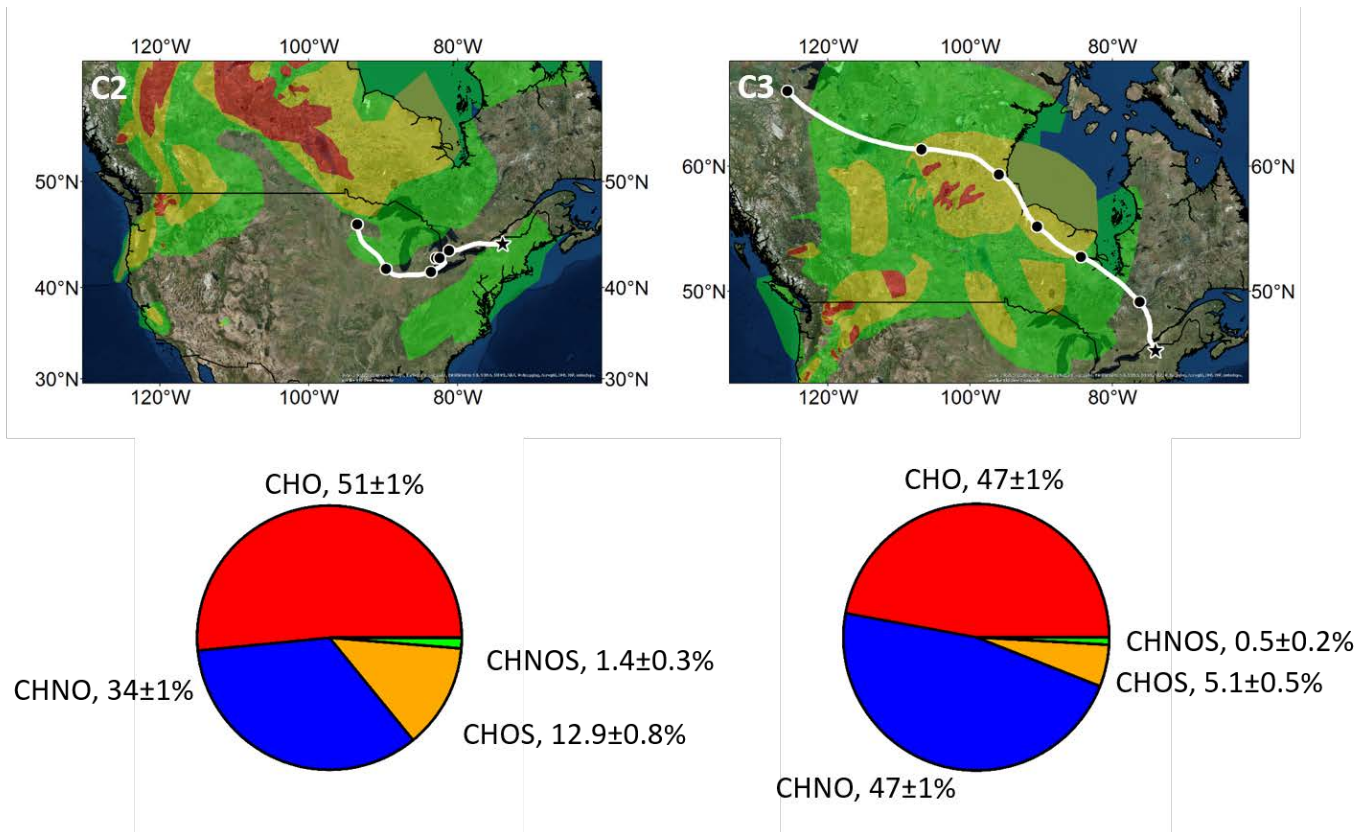

88 **Fig. S5.** NOAA HYSPLIT 144 h (6 day) backward air mass trajectories (white lines, with 6 h  
 89 resolution shown as black dots) and corresponding changes in cloud water molecular  
 90 composition, shown as compound type number percentages during the wildfire event  
 91 (samples C2 and C3). Green, yellow, and red shading on the maps represent low, moderate,  
 92 and high amounts of smoke, respectively, as defined by the NOAA Hazard Mapping System  
 93 Fire and Smoke Product (<http://www.ospo.noaa.gov/Products/land/hms.html>).

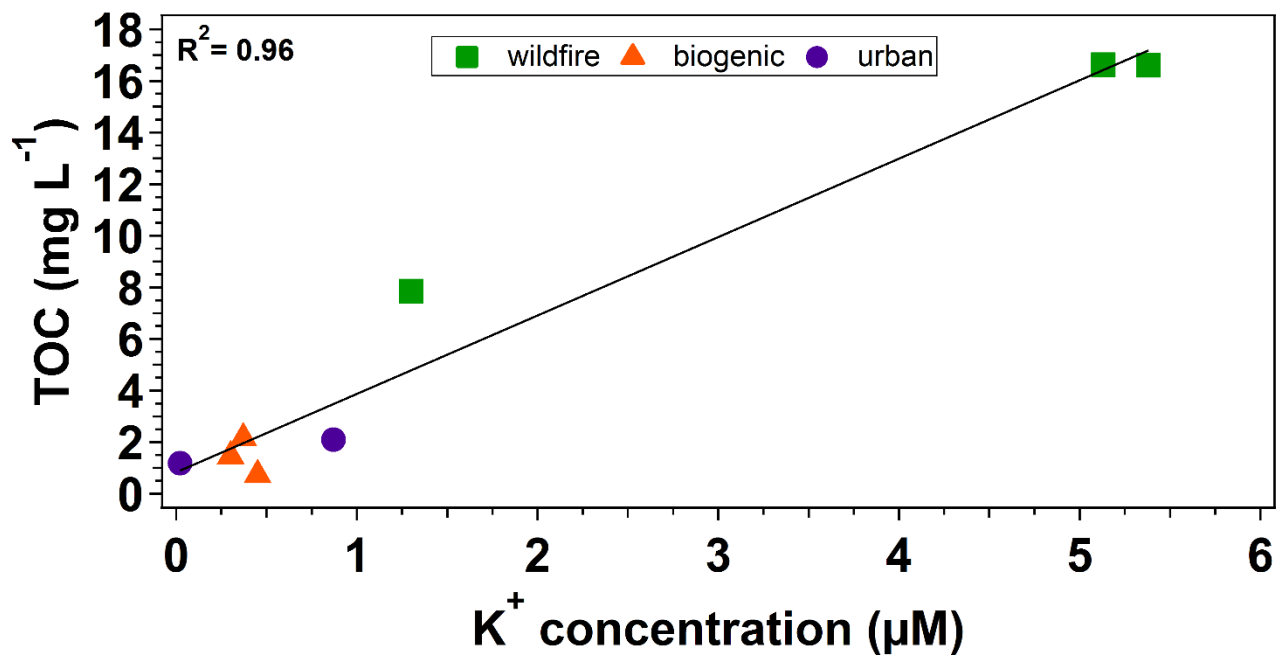

94

95 **Fig. S6.** Correlation between cloud water total organic content (TOC) and K<sup>+</sup> concentration  
96 for each sample, categorized by air mass source influence.
